# Supplementary material for: Nitrogen-doped carbon-coated Ti–Fe–O nanocomposites with enhanced reversible capacity and rate capability for high-performance lithium-ion batteries
Source: Royal Society of Chemistry journal article supplement (doi:10.1039/c6ra10682j), 2016-01-01
Supplement: c6ra10682j1.pdf [file c6ra10682j1.pdf]

## Supporting Information

### **Nitrogen-Doped Carbon-Coated Ti-Fe-O Nanocomposites with Enhanced Reversible Capacity and Rate Capability for High-Performance Lithium-Ion Batteries**

Tao Li, Xue Bai, Ning Lun, Yong-Xin Qi, Yun Tian\* and Yu-Jun Bai\*

Key Laboratory for Liquid-Solid Structural Evolution and Processing of Materials (Ministry of Education), Shandong University, Jinan 250061, PR China

\*Corresponding authors. Tel/Fax: +86 531 88392315. E-mail address: byj97@126.com (Y.-J. Bai); ytian@sdu.edu.cn (Y. Tian).

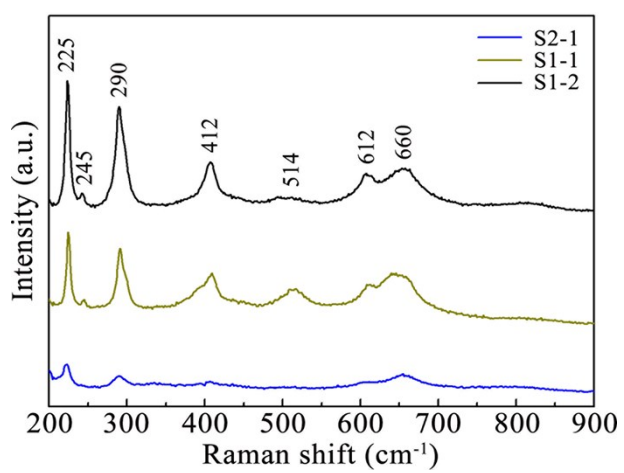

**Fig. S1** Raman spectra of the as-sintered products of S2-1, S1-1 and S1-2.

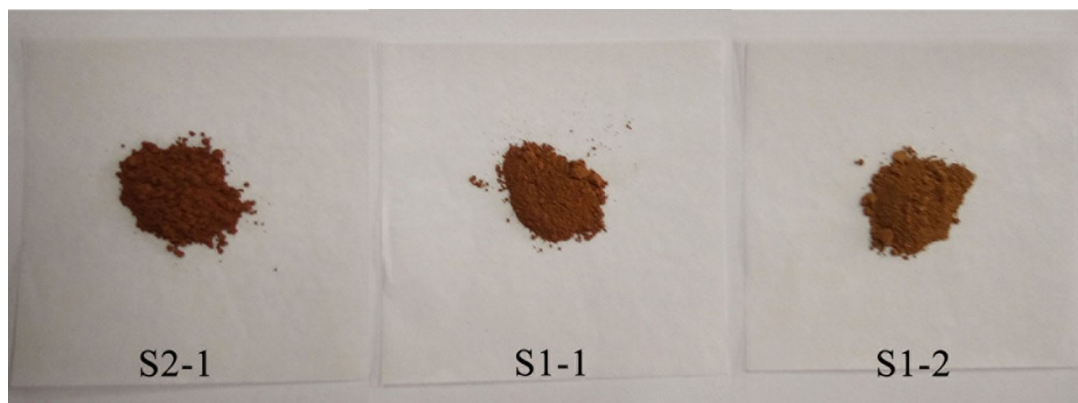

**Fig. S2** Photographs of S2-1, S1-1, and S1-2.

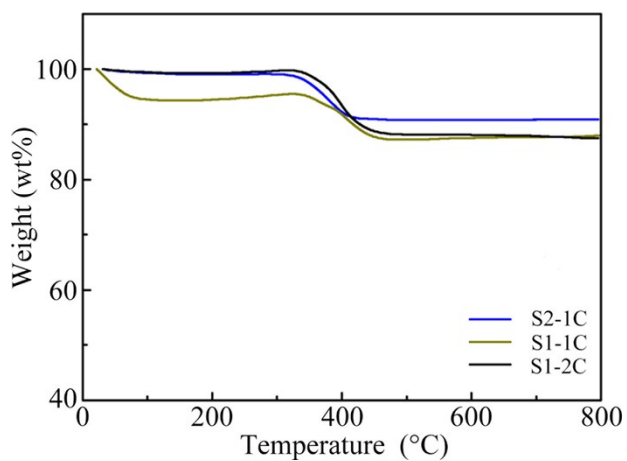

**Fig. S3** TGA curves of S2-1C, S1-1C, and S1-2C.

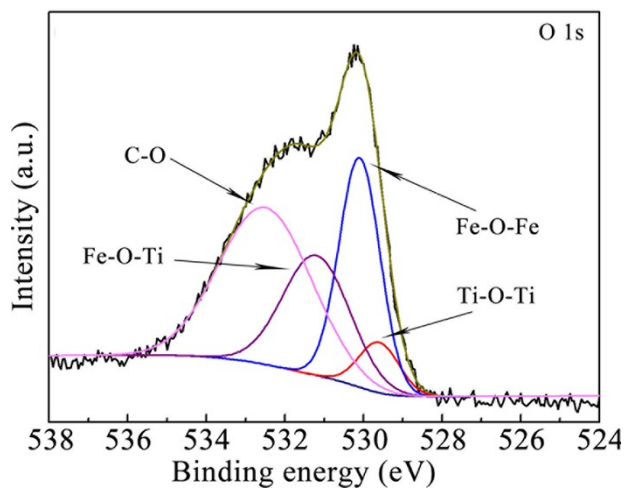

**Fig. S4** XPS spectra of O 1s of S1-2C.

**Table S1** Mass fractions of  $\text{TiO}_2$ ,  $\text{Fe}_3\text{O}_4$ , and  $\text{FeTiO}_3$  in S2-1C, S1-1C, and S1-2C.

| Samples | $\text{TiO}_2$ (wt%) | $\text{Fe}_3\text{O}_4$ (wt%) | $\text{FeTiO}_3$ (wt%) | Carbon (wt%) |
|---------|----------------------|-------------------------------|------------------------|--------------|
| S2-1C   | 31.1                 | 20.0                          | 40.7                   | 8.2          |
| S1-1C   | 22.1                 | 43.8                          | 25.8                   | 8.3          |
| S1-2C   | 7.0                  | 46.9                          | 35.0                   | 11.1         |

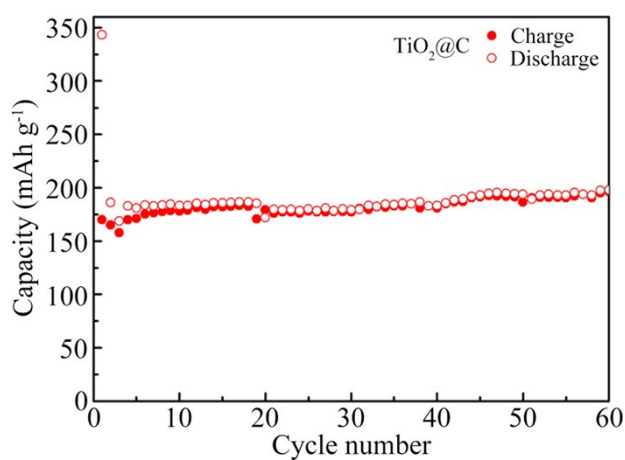

**Fig. S5** Cycling performance of  $\text{TiO}_2@\text{C}$  at  $100 \text{ mA g}^{-1}$ .

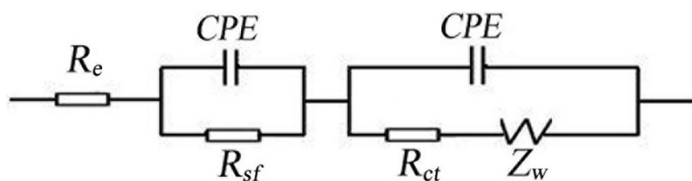

**Fig. S6** Equivalent circuit fitting to the EIS.
